# Supplementary material
Source: PubMed Central journal article supplement (PMC3485732)
Supplement: AEM.02275-12_zam999103795so1.pdf [file AEM.02275-12_zam999103795so1.pdf]

**Supporting information to: Evidence of *in vivo* prophage induction during *Clostridium difficile* infection**

Mathieu Meessen-Pinard, Ognjen Sekulovic, Louis-Charles Fortier\*

Département de microbiologie et d'infectiologie, Faculté de médecine et des sciences de la santé,  
Université de Sherbrooke, Québec, Canada, J1E 4K8

\*Corresponding author:

Louis-Charles Fortier. Département de microbiologie et d'infectiologie, Faculté de médecine et des sciences de la santé, Université de Sherbrooke, 3201 rue Jean-Mignault, Sherbrooke, Québec, Canada, J1E 4K8. Phone: (819) 821-8000 ext 75322. Fax: (819) 820-6831. email: [Louis-Charles.Fortier@USherbrooke.ca](mailto:Louis-Charles.Fortier@USherbrooke.ca)

Keywords: *Clostridium difficile*, temperate bacteriophage, prophage, spontaneous induction

Running title: *In vivo* prophage induction in *C. difficile*

M.M.-P. and O.S. contributed equally to this work.

**TABLE S1. Putative coding sequences from  $\phi$ MMP02 and bioinformatics analyses of the deduced proteins**

| ORF | Start | End   | Size (pb) | Size (aa) | Ribosome binding site (RBS)            | Predicted fonction <sup>a</sup>    | BLASTp hit - accession number [source organism] <sup>b</sup>                               | Alignement (%ID) | Size (aa) <sup>c</sup> | E value |
|-----|-------|-------|-----------|-----------|----------------------------------------|------------------------------------|--------------------------------------------------------------------------------------------|------------------|------------------------|---------|
| 1   | 62    | 763   | 760       | 233       | aaacgagg <sub>ggggaat</sub> ATG        | Terminase small subunit            | YP_002290877 putative terminase small subunit [ <i>Clostridium</i> phage phiCD27]          | 232/233 (99%)    | 233                    | 2E-131  |
| 2   | 756   | 2165  | 1410      | 469       | aaacgtgg <sub>ggttaacc</sub> ATG       | Terminase large subunit            | YP_002290878 putative terminase B [ <i>Clostridium</i> phage phiCD27]                      | 464/469 (99%)    | 469                    | 0E+00   |
| 3   | 2156  | 3658  | 1503      | 500       | gaaaggggg <sub>gaggtgt</sub> ATG       | Portal protein                     | YP_002290879 putative portal protein [ <i>Clostridium</i> phage phiCD27]                   | 491/500 (99%)    | 500                    | 0       |
| 4   | 3645  | 4658  | 1014      | 337       | aaaggga <sub>aaan</sub> ATG            | Head morphogenesis protein         | YP_002290880 putative head morphogenesis protein [ <i>Clostridium</i> phage phiCD27]       | 331/335 (99%)    | 335                    | 0       |
| 5   | 4678  | 6012  | 1335      | 444       | gaaaggtgg <sub>tgattaa</sub> ATG       |                                    | YP_002290881 hypothetical protein phiCD27_gp05 [ <i>Clostridium</i> phage phiCD27]         | 443/444 (99%)    | 444                    | 0       |
| 6   | 6028  | 6411  | 384       | 127       | aaaggag <sub>tgatgttat</sub> ATG       |                                    | YP_002290882 hypothetical protein phiCD27_gp06 [ <i>Clostridium</i> phage phiCD27]         | 127/127 (100%)   | 127                    | 2E-67   |
| 7   | 6430  | 7467  | 1038      | 345       | aaaggag <sub>tgataaata</sub> ATG       |                                    | YP_002290883 hypothetical protein phiCD27_gp07 [ <i>Clostridium</i> phage phiCD27]         | 345/345 (100%)   | 345                    | 0       |
| 8   | 7507  | 7845  | 339       | 112       | gagggtg <sub>aaat</sub> ATG            |                                    | YP_002290884 hypothetical protein phiCD27_gp08 [ <i>Clostridium</i> phage phiCD27]         | 111/112 (99%)    | 112                    | 1E-57   |
| 9   | 7842  | 8219  | 378       | 125       | agaa <sub>ttgaaat</sub> ATG            |                                    | YP_002290885 hypothetical protein phiCD27_gp09 [ <i>Clostridium</i> phage phiCD27]         | 123/125 (99%)    | 125                    | 4E-64   |
| 10  | 8221  | 8631  | 411       | 136       | gaaagga <sub>tgattaa</sub> ATG         | Putative tail component protein    | YP_002290886 hypothetical protein phiCD27_gp10 [ <i>Clostridium</i> phage phiCD27]         | 137/139 (99%)    | 148                    | 4E-75   |
| 11  | 8632  | 9453  | 822       | 273       | ggag <sub>tgattaa</sub> ATG            |                                    | YP_002290887 hypothetical protein phiCD27_gp11 [ <i>Clostridium</i> phage phiCD27]         | 262/273 (96%)    | 273                    | 4E-151  |
| 12  | 9466  | 9669  | 204       | 67        | aggagg <sub>ggcagaa</sub> TTG          |                                    | YP_002290888 hypothetical protein phiCD27_gp12 [ <i>Clostridium</i> phage phiCD27]         | 60/67 (90%)      | 67                     | 2E-24   |
| 13  | 9671  | 11092 | 1422      | 473       | agaaagagagg <sub>gaaataa</sub> ATG     | Tail sheath protein (XkdK-related) | YP_002290889 hypothetical protein phiCD27_gp13 [ <i>Clostridium</i> phage phiCD27]         | 454/473 (96%)    | 473                    | 0       |
| 14  | 11108 | 11521 | 414       | 137       | aaaggagg <sub>taagaa</sub> ATG         | XkdM-related protein               | YP_002290890 hypothetical protein phiCD27_gp14 [ <i>Clostridium</i> phage phiCD27]         | 57/136 (42%)     | 140                    | 1E-24   |
| 15  | 11605 | 12096 | 492       | 163       | ggagg <sub>aaatgt</sub> ATG            | XkdN-related protein               | YP_002290891 hypothetical protein phiCD27_gp15 [ <i>Clostridium</i> phage phiCD27]         | 87/145 (60%)     | 157                    | 7E-43   |
| 16  | 12102 | 12254 | 153       | 50        |                                        |                                    |                                                                                            |                  |                        |         |
| 17  | 12273 | 15547 | 4275      | 1424      | agaaagg <sub>aaag</sub> CTG            | Phage tail tape measure protein    | YP_002290892 putative phage tail tape measure protein [ <i>Clostridium</i> phage phiCD27]  | 641/1527 (42%)   | 1429                   | 0       |
| 18  | 16630 | 17373 | 744       | 247       | aggggg <sub>aaatrr</sub> ATG           | Putative secreted protein          | YP_002290893 hypothetical protein phiCD27_gp17 [ <i>Clostridium</i> phage phiCD27]         | 31/58 (54%)      | 285                    | 7E-07   |
| 19  | 17442 | 18113 | 672       | 223       | aaaagagg <sub>tgataac</sub> TTG        | Peptidoglycan-binding LysM protein | YP_002290894 putative peptidoglycan-binding LysM [ <i>Clostridium</i> phage phiCD27]       | 209/223 (94%)    | 223                    | 4E-111  |
| 20  | 18110 | 19072 | 963       | 320       | aaagtgg <sub>tgataaccttaac</sub> ATG   | XkdQ-related protein               | YP_002290895 hypothetical protein phiCD27_gp19 [ <i>Clostridium</i> phage phiCD27]         | 309/320 (97%)    | 320                    | 9E-171  |
| 21  | 19065 | 19430 | 366       | 121       | aaggagg <sub>gaaattaccttaata</sub> ATG |                                    | YP_002290896 hypothetical protein phiCD27_gp20 [ <i>Clostridium</i> phage phiCD27]         | 110/120 (92%)    | 120                    | 1E-57   |
| 22  | 19405 | 19863 | 459       | 152       | ggagg <sub>gattgaa</sub> ATG           | XkdS-related protein               | YP_002290897 hypothetical protein phiCD27_gp21 [ <i>Clostridium</i> phage phiCD27]         | 142/152 (94%)    | 152                    | 1E-76   |
| 23  | 19872 | 21008 | 1137      | 378       | aaagtagg <sub>tgattat</sub> ATG        | Baseplate J family protein         | YP_002290898 hypothetical protein phiCD27_gp22 [ <i>Clostridium</i> phage phiCD27]         | 343/378 (91%)    | 377                    | 0       |
| 24  | 21005 | 21634 | 630       | 209       | aggtgg <sub>tggtg</sub> ATG            | XkdT-related protein               | YP_001254823 hypothetical protein CBO2332 [ <i>C. botulinum</i> A str. ATCC 3502]          | 116/209 (56%)    | 211                    | 8E-64   |
| 25  | 21647 | 22669 | 1023      | 340       | aggagg <sub>gggtataa</sub> ATG         | Phage tail fiber protein           | YP_001110744 putative tail fiber protein [ <i>Clostridium</i> phage phiC2]                 | 253/338 (75%)    | 341                    | 1E-138  |
| 26  | 22684 | 24366 | 1683      | 560       | aaaggagag <sub>tgagaaa</sub> ATG       |                                    | ZP_05352971 hypothetical protein CdifA_19608 [ <i>C. difficile</i> ATCC 43255]             | 456/570 (80%)    | 571                    | 0       |
| 27  | 24383 | 24676 | 294       | 97        | gagggtg <sub>aaana</sub> ATG           |                                    | YP_001087449 hypothetical protein CD0968 [ <i>C. difficile</i> 630]                        | 86/97 (89%)      | 97                     | 4E-42   |
| 28  | 24676 | 24858 | 183       | 60        | aggaggaa <sub>attata</sub> ATG         |                                    | ZP_05352945 hypothetical protein CdifA_19478 [ <i>C. difficile</i> ATCC 43255]             | 57/59 (97%)      | 60                     | 1E-23   |
| 29  | 24891 | 25829 | 939       | 312       | gaaagaag <sub>tgactaa</sub> ATG        |                                    | YP_002290905 hypothetical protein phiCD27_gp29 [ <i>Clostridium</i> phage phiCD27]         | 304/310 (99%)    | 410                    | 5E-175  |
| 30  | 26119 | 26418 | 300       | 99        | gaaaggag <sub>aatcat</sub> ATG         |                                    | YP_002290906 hypothetical protein phiCD27_gp30 [ <i>Clostridium</i> phage phiCD27]         | 94/99 (95%)      | 99                     | 9E-47   |
| 31  | 26420 | 26557 | 138       | 45        | aatggg <sub>ggtatagt</sub> ATG         | XkdX-related protein               | YP_002290907 hypothetical protein phiCD27_gp31 [ <i>Clostridium</i> phage phiCD27]         | 43/45 (96%)      | 45                     | 3E-16   |
| 32  | 26589 | 26819 | 231       | 76        | aggagg <sub>tttc</sub> ATG             |                                    | YP_002290908 hypothetical protein phiCD27_gp32 [ <i>Clostridium</i> phage phiCD27]         | 76/76 (100%)     | 76                     | 7E-36   |
| 33  | 26838 | 27095 | 258       | 85        | aggagg <sub>aaataaaga</sub> ATG        | Holin                              | YP_002290909 holin [ <i>Clostridium</i> phage phiCD27]                                     | 85/85 (100%)     | 85                     | 7E-40   |
| 34  | 27095 | 27907 | 813       | 270       | aggagg <sub>aaataaata</sub> ATG        | Endolysin                          | EHJ29023.1 N-acetylmuramoyl-L-alanine amidase [ <i>Clostridium difficile</i> 050-P50-2011] | 246/270 (92%)    | 270                    | 2E-142  |
| 35  | 28157 | 28648 | 492       | 163       | aggggg <sub>attaaa</sub> ATG           |                                    | ZP_01994810 hypothetical protein DORLON_00799 [ <i>Dorea longicatena</i> DSM 13814]        | 43/184 (24%)     | 185                    | 5E-08   |
| 36  | 28650 | 29216 | 567       | 188       | aggaaag <sub>aatagt</sub> ATG          | Putative membrane protein          | YP_004062980 hypothetical protein CKC_03715 [ <i>C. Liberibacter</i> CLso-ZC1]             | 32/91 (36%)      | 158                    | 2E-05   |
| 37  | 29815 | 29627 | 189       | 62        | gaaagga <sub>ataaaaat</sub> ATG        |                                    | YP_001110759 hypothetical protein phiC2p43 [ <i>Clostridium</i> phage phiC2]               | 62/62 (100%)     | 62                     | 3E-26   |
| 38  | 30075 | 30218 | 144       | 47        | aggaaggagg <sub>ggagaa</sub> ATG       |                                    | YP_001089402.1 hypothetical protein phiCD27_gp41 [ <i>Clostridium</i> phage phiCD27]       | 47/47 (100%)     | 47                     | 2E-24   |
| 39  | 30726 | 31115 | 390       | 129       | aaggag <sub>tgacataa</sub> ATG         | Regulatory protein                 | ZP_05349389.1 putative phage regulatory protein [ <i>Clostridium difficile</i> ATCC 43255] | 65/92 (71%)      | 93                     | 3E-31   |
| 40  | 31208 | 31489 | 282       | 93        | aaaggggg <sub>tgacataa</sub> ATG       | Regulatory protein                 | ZP_05349390 putative regulatory protein [ <i>C. difficile</i> ATCC 43255]                  | 83/89 (94%)      | 126                    | 8E-42   |
| 41  | 32850 | 31804 | 1047      | 348       | ggggg <sub>gtctaaa</sub> ATG           | Integrase                          | ZP_05349367 phage integrase family protein [ <i>C. difficile</i> ATCC 43255]               | 306/348 (88%)    | 351                    | 0       |
| 42  | 33142 | 32927 | 216       | 71        | aaaggtgg <sub>attataaa</sub> ATG       | Lambda repressor-like              | ZP_05349368 hypothetical protein CdifA_01317 [ <i>C. difficile</i> ATCC 43255]             | 56/60 (94%)      | 71                     | 5E-23   |

**TABLE S1. Putative coding sequences from φMMP02 and bioinformatics analyses of the deduced proteins**

| ORF | Start | End   | Size (pb) | Size (aa) | Ribosome binding site (RBS)                         | Predicted fonction <sup>a</sup>     | BLASTp hit - accession number [source organism] <sup>b</sup>                        | Alignement (%ID) | Size (aa) <sup>c</sup> | E value |
|-----|-------|-------|-----------|-----------|-----------------------------------------------------|-------------------------------------|-------------------------------------------------------------------------------------|------------------|------------------------|---------|
| 43  | 33428 | 33559 | 132       | 43        | agggga <sub>13</sub> ggttat <sup>-</sup> TTG        |                                     |                                                                                     |                  |                        |         |
| 44  | 33997 | 33576 | 402       | 133       | aggtgagg <sub>13</sub> gfgaan <sup>-</sup> ATG      | Lambda repressor-like               | ZP_04088144.1 Transcriptional regulator, MerR [Bacillus thuringiensis BGSC 4BD1]    | 42/77 (55%)      | 153                    | 2E-16   |
| 45  | 34409 | 34504 | 96        | 31        | aaaaggag <sub>13</sub> caagtat <sup>-</sup> ATG     |                                     |                                                                                     |                  |                        |         |
| 46  | 34867 | 34649 | 219       | 72        | ggag <sub>13</sub> cggtgatt <sup>-</sup> ATG        | Phage repressor (XRE family)        | YP_529597 hypothetical protein CDBPCV119_gp46 [Clostridium phage phi CD119]         | 70/72 (98%)      | 72                     | 8E-44   |
| 47  | 34980 | 35174 | 195       | 64        | aaaggag <sub>13</sub> agg <sup>-</sup> GTG          | Phage repressor                     | YP_529597 hypothetical protein CDBPCV119_gp46 [Clostridium phage phi CD119]         | 26/61 (43%)      | 72                     | 2E-08   |
| 48  | 35216 | 36010 | 795       | 264       | agaaaaggag <sub>13</sub> ctttgat <sup>-</sup> ATG   | Phage antirepressor                 | YP_529598 putative antirepressor [Clostridium phage phi CD119]                      | 245/262 (94%)    | 277                    | 2E-140  |
| 49  | 36094 | 36474 | 381       | 126       | agggag <sub>13</sub> daaatac <sup>-</sup> ATG       |                                     | YP_001110771 hypothetical protein phiC2p56 [Clostridium phage phiC2]                | 122/126 (97%)    | 126                    | 1E-61   |
| 50  | 36613 | 36464 | 150       | 49        | aaag <sub>13</sub> g <sup>-</sup> GTG               |                                     | YP_001110772 Hypothetical protein phiC2p57 [Clostridium phage phiC2]                | 49/50 (98%)      | 50                     | 2E-17   |
| 51  | 36675 | 36872 | 198       | 65        | aaaggagg <sub>13</sub> gaaatg <sup>-</sup> ATG      | Phage regulator                     | YP_001110773 putative repressor [Clostridium phage phiC2]                           | 62/65 (96%)      | 65                     | 4E-27   |
| 52  | 36911 | 37117 | 207       | 68        | aaagttag <sub>13</sub> ggttatg <sup>-</sup> ATG     |                                     | ZP_05349377 hypothetical protein CdifA_01362 [C. difficile ATCC 43255]              | 32/63 (51%)      | 74                     | 9E-10   |
| 53  | 37188 | 37292 | 105       | 34        | aggaaag <sub>13</sub> gggattg <sup>-</sup> TTG      |                                     | ZP_05349378 hypothetical protein CdifA_01367 [C. difficile ATCC 43255]              | 30/34 (89%)      | 34                     | 5E-09   |
| 54  | 37530 | 37847 | 318       | 105       | aagagggg <sub>13</sub> attaac <sup>-</sup> ATG      |                                     | ZP_05349380 hypothetical protein CdifA_01377 [C. difficile ATCC 43255]              | 97/105 (93%)     | 105                    | 2E-44   |
| 55  | 37930 | 38439 | 510       | 169       | aaatggagg <sub>13</sub> gaaat <sup>-</sup> ATG      |                                     | YP_001110779 Gp157-like protein [Clostridium phage phiC2]                           | 163/169 (97%)    | 169                    | 2E-84   |
| 56  | 38449 | 39057 | 609       | 202       | aaaagtag <sub>13</sub> ggagacc <sup>-</sup> ATG     | Putative ERF protein                | YP_529602 hypothetical protein CDBPCV119_gp51 [Clostridium phage phi CD119]         | 199/202 (99%)    | 202                    | 1E-110  |
| 57  | 39067 | 39948 | 882       | 293       | aagag <sub>13</sub> taggtgagtg <sup>-</sup> TTG     | Phage replication protein           | YP_001110781 putative DnaD [Clostridium phage phiC2]                                | 280/293 (96%)    | 296                    | 4E-156  |
| 58  | 40009 | 40182 | 174       | 57        | agaaaggggg <sub>13</sub> gataaa <sup>-</sup> ATG    |                                     | ZP_05349384 putative phage resolvase/integrase (partial) [C. difficile ATCC 43255]  | 57/57 (100%)     | 57                     | 4E-24   |
| 59  | 40198 | 40614 | 417       | 138       | agaaggggg <sub>13</sub> ccatgttaa <sup>-</sup> ATG  | SSB                                 | YP_529604 hypothetical protein CDBPCV119_gp53 [Clostridium phage phi CD119]         | 115/138 (84%)    | 135                    | 3E-60   |
| 60  | 40685 | 41098 | 414       | 137       | ggagg <sub>13</sub> gattgaa <sup>-</sup> ATG        | YopX family protein                 | ZP_05349386 hypothetical protein CdifA_01407 [C. difficile ATCC 43255]              | 133/137 (98%)    | 136                    | 5E-69   |
| 61  | 41085 | 41336 | 252       | 83        | gagggggg <sub>13</sub> catagaa <sup>-</sup> ATG     |                                     | ZP_05349387 hypothetical protein CdifA_01412 [C. difficile ATCC 43255]              | 76/83 (92%)      | 83                     | 3E-36   |
| 62  | 41354 | 41707 | 354       | 117       | agggagggg <sub>13</sub> ggaactaaat <sup>-</sup> ATG |                                     | YP_529608.1 hypothetical protein CDBPCV119_gp57 [Clostridium phage phi CD119]       | 48/109 (44%)     | 106                    | 1E-15   |
| 63  | 41676 | 41816 | 141       | 46        | aaagag <sub>13</sub> gagcag <sup>-</sup> ATG        |                                     | ZP_05353027 hypothetical protein CdifA_19888 [C. difficile ATCC 43255]              | 42/44 (96%)      | 46                     | 8E-14   |
| 64  | 41813 | 41929 | 117       | 38        | gagggga <sub>13</sub> gittagaana <sup>-</sup> ATG   |                                     | ZP_05332132 hypothetical protein CdifQCD-6_20253 [C. difficile QCD-63q42]           | 38/38 (100%)     | 38                     | 2E-13   |
| 65  | 41932 | 42108 | 177       | 58        | aaagagg <sub>13</sub> ggtataaga <sup>-</sup> ATG    |                                     | ZP_05332133 hypothetical protein CdifQCD-6_20258 [C. difficile QCD-63q42]           | 58/58 (100%)     | 58                     | 1E-23   |
| 66  | 42218 | 43291 | 1074      | 357       | aaggagg <sub>13</sub> cggtgta <sup>-</sup> TTG      | DNA-cytosine methyltransferase      | YP_001110788 putative cytosine-C5 specific DNA methylase [C. difficile phage phiC2] | 311/311 (100%)   | 316                    | 0       |
| 67  | 43371 | 43580 | 210       | 69        | aagggg <sub>13</sub> gggataa <sup>-</sup> ATG       |                                     | YP_001110789 hypothetical protein phiC2p74 [Clostridium phage phiC2]                | 68/69 (99%)      | 69                     | 2E-30   |
| 68  | 43592 | 44596 | 1005      | 334       | aaggggtgaaatt <sup>-</sup> ATG                      |                                     | YP_001110790 hypothetical protein phiC2p75 [Clostridium phage phiC2]                | 315/334 (95%)    | 334                    | 3E-174  |
| 69  | 44605 | 44772 | 168       | 55        | gaagaaaag <sub>13</sub> aggtgacat <sup>-</sup> ATG  |                                     | YP_529616 hypothetical protein CDBPCV119_gp65 [Clostridium phage phi CD119]         | 44/52 (85%)      | 57                     | 6E-17   |
| 70  | 44857 | 45129 | 273       | 90        | aggaaggagg <sub>13</sub> gagatt <sup>-</sup> ATG    |                                     | ZP_05332140 hypothetical protein CdifQCD-6_20293 [C. difficile QCD-63q42]           | 72/89 (81%)      | 95                     | 7E-32   |
| 71  | 45152 | 45382 | 231       | 76        | aaaggg <sub>13</sub> ggtgactt <sup>-</sup> ATG      | ASCH domain protein                 | ZP_05332243.1 hypothetical protein CdifQCD-6_20810 [C. difficile QCD-63q42]         | 41/75 (55%)      | 140                    | 2E-21   |
| 72  | 45434 | 45934 | 501       | 166       | gaagaaga <sub>13</sub> gcagttggt <sup>-</sup> GTG   |                                     | YP_001089447 hypothetical protein CD2932 [C. difficile 630]                         | 90/132 (69%)     | 166                    | 3E-40   |
| 73  | 45924 | 46367 | 444       | 147       | aaatgagg <sub>13</sub> ingccat <sup>-</sup> ATG     | RusA endonuclease                   | YP_001089446 phage protein [C. difficile 630]                                       | 82/147 (56%)     | 139                    | 5E-40   |
| 74  | 46324 | 46566 | 243       | 80        | aagaaa <sub>13</sub> attata <sup>-</sup> GTG        |                                     |                                                                                     |                  |                        |         |
| 75  | 46671 | 47177 | 507       | 168       | aggag <sub>13</sub> ggtgaggt <sup>-</sup> ATG       | Putative sigma factor               | ZP_03292416 hypothetical protein CLOHIR_00359 [C. hiranonis DSM 13275]              | 53/154 (35%)     | 172                    | 1E-09   |
| 76  | 47718 | 48395 | 678       | 225       | aggagg <sub>13</sub> tagtgr <sup>-</sup> ATG        | Phage repressor (Bro-N superfamily) | YP_002290951 hypothetical protein phiCD27_gp75 [Clostridium phage phiCD27]          | 225/225 (100%)   | 225                    | 1E-127  |

<sup>a</sup> Inferred from BLASTp analyses on GenBank and ACLAME databases, and by conserved domains found by InterProScan analysis and through the conserved domains database (CDD) at NCBI

<sup>b</sup> Only the best or the most relevant BLASTp hits are shown

<sup>c</sup> Size in amino acids (aa) of the BLASTp database subject

ERF = Essential Recombination Function protein; SSB = Single-Stranded DNA-Binding protein

TABLE S2. Putative coding sequences from φMMP04 and bioinformatics analyses of the deduced proteins

| ORF | Start | End   | Size (pb) | Size (aa) | Ribosome binding site (RBS)          | Predicted fonction <sup>a</sup>          | BLAST hit and accession number [source organism] <sup>b</sup>                                 | Alignment (%ID) | Size (aa) <sup>c</sup> | E value |
|-----|-------|-------|-----------|-----------|--------------------------------------|------------------------------------------|-----------------------------------------------------------------------------------------------|-----------------|------------------------|---------|
| 1   | 22    | 1671  | 1650      | 189       | aaaggtaga <sub>cttaagaa</sub> ATG    | Terminase                                | EHJ28459 putative phage terminase, large subunit [ <i>Clostridium difficile</i> 002-P50-2011] | 504/549 (92%)   | 549                    | 0       |
| 2   | 1687  | 2841  | 1155      | 384       | aaggggg <sub>tgaaaa</sub> ATG        | Phage portal protein                     | EHJ28460 phage portal protein [ <i>Clostridium difficile</i> 002-P50-2011]                    | 359/384 (93%)   | 384                    | 0       |
| 3   | 2847  | 3584  | 738       | 245       | ggaaggagg <sub>cgagaaattaa</sub> ATG | ATP-dependent Clp protease               | EHJ28461 endopeptidase Clp [ <i>Clostridium difficile</i> 002-P50-2011]                       | 214/245 (87%)   | 245                    | 7E-149  |
| 4   | 3577  | 4845  | 1269      | 422       | aggggg <sub>cttaa</sub> ATG          | Major capsid protein                     | EHJ28462 phage capsid family protein [ <i>Clostridium difficile</i> 002-P50-2011]             | 184/433 (42%)   | 422                    | 7E-87   |
| 5   | 4855  | 5142  | 288       | 95        | gaagtagg <sub>gttttga</sub> ATG      | Head-Tail connector (gp6-like)           | EHJ28463 phage DNA packaging protein [ <i>Clostridium difficile</i> 002-P50-2011]             | 91/95 (96%)     | 95                     | 2E-47   |
| 6   | 5144  | 5482  | 339       | 112       | agtagg <sub>actaaa</sub> ATG         | Phage head-tail adaptor                  | EHJ28464 putative phage head-tail adaptor [ <i>Clostridium difficile</i> 002-P50-2011]        | 106/112 (95%)   | 112                    | 8E-71   |
| 7   | 5475  | 5888  | 414       | 137       | aaagaagg <sub>tgttaca</sub> ATG      |                                          | EHJ28465 phage protein, HK97 gp10 family [ <i>Clostridium difficile</i> 002-P50-2011]         | 128/137 (93%)   | 137                    | 1E-33   |
| 8   | 5900  | 6316  | 417       | 138       | agaggggg <sub>caaga</sub> GTG        |                                          | EHJ28466 hypothetical protein HMPREF1122_02772 [ <i>Clostridium difficile</i> 002-P50-2011]   | 129/138 (93%)   | 138                    | 1E-84   |
| 9   | 6334  | 7401  | 1068      | 355       | aaaggagg <sub>ctttatt</sub> TTG      | Phage tail sheath protein (XkdK-related) | EHJ28467 hypothetical protein HMPREF1122_02773 [ <i>Clostridium difficile</i> 002-P50-2011]   | 339/355 (95%)   | 355                    | 0       |
| 10  | 7414  | 7692  | 279       | 92        | aagaagg <sub>tgatag</sub> ATG        | XkdM-related protein                     | EHJ28468 hypothetical protein HMPREF1122_02774 [ <i>Clostridium difficile</i> 002-P50-2011]   | 75/87 (86%)     | 149                    | 2E-42   |
| 11  | 7928  | 8293  | 366       | 121       | ggaaaa <sub>taaaagaa</sub> ATG       | XkdN-related protein                     | EHJ28469 phage XkdN-like protein [ <i>Clostridium difficile</i> 002-P50-2011]                 | 121/121 (100%)  | 121                    | 1E-80   |
| 12  | 8311  | 8484  | 174       | 57        | aaaa <sub>cgatgtgaa</sub> ATG        |                                          | EHJ28470 hypothetical protein HMPREF1122_02776 [ <i>Clostridium difficile</i> 002-P50-2011]   | 57/57 (100%)    | 57                     | 3E-37   |
| 13  | 8477  | 10246 | 1770      | 589       | ggagg <sub>tgtaaaa</sub> ATG         | Tail tape measure protein                | EHJ28471 hypothetical protein HMPREF1122_02777 [ <i>Clostridium difficile</i> 002-P50-2011]   | 570/579 (98%)   | 584                    | 0       |
| 14  | 10230 | 10865 | 636       | 211       | gaaaatgggg <sub>tggttca</sub> ATG    | LysM (XkdP-related)                      | EHJ28472 LysM domain protein [ <i>Clostridium difficile</i> 002-P50-2011]                     | 206/211 (98%)   | 211                    | 4E-151  |
| 15  | 11105 | 11383 | 279       | 92        | aaagaaa <sub>ctctatgagaa</sub> ATG   | Cell wall hydrolase (XkdQ-related)       | YP_529574 XkdQ protein [ <i>Clostridium</i> phage phi CD119]                                  | 83/90 (92%)     | 228                    | 8E-41   |
| 16  | 11380 | 12624 | 1245      | 414       | aaaaaaag <sub>at</sub> ATG           | Cell wall hydrolase (NlpC/P60 family)    | EHJ28473 NlpC/P60 family protein [ <i>Clostridium difficile</i> 002-P50-2011]                 | 402/414 (97%)   | 505                    | 0       |
| 17  | 12639 | 12965 | 327       | 35        | aaaggtgg <sub>tgtaaa</sub> GTG       |                                          | YP_001087867 hypothetical protein CD1369 [ <i>C. difficile</i> 630]                           | 101/108 (94%)   | 108                    | 0       |
| 18  | 12965 | 13393 | 429       | 142       | gggtgag <sub>cttata</sub> ATG        | XkdS-related protein                     | EHJ28838 phage protein XkdS [ <i>Clostridium difficile</i> 002-P50-2011]                      | 133/142 (94%)   | 142                    | 1E-91   |
| 19  | 13386 | 14438 | 1053      | 350       | ggggagg <sub>tgaaagta</sub> ATG      | Baseplate j-like (XkdT-related)          | YP_529578 XkdT protein [ <i>Clostridium</i> phage phi CD119]                                  | 315/350 (90%)   | 350                    | 0       |
| 20  | 14438 | 15055 | 618       | 205       | gaggtgg <sub>tgattta</sub> ATG       |                                          | YP_529579 hypothetical protein CDBPCV119_gp28 [ <i>Clostridium</i> phage phi CD119]           | 172/202 (85%)   | 202                    | 9E-99   |
| 21  | 15056 | 15838 | 783       | 73        | aggagg <sub>gatata</sub> TTG         | Tail fiber protein                       | ZP_05332079 putative phage tail fiber protein [ <i>C. difficile</i> QCD-63q42]                | 226/260 (87%)   | 260                    | 2E-120  |
| 22  | 15855 | 17120 | 1266      | 421       | agaaagtgagg <sub>tgtaaa</sub> GTG    |                                          | ZP_05354705 hypothetical protein CdifQCD-7_02151 [ <i>C. difficile</i> QCD-76w55]             | 249/413 (60%)   | 495                    | 3E-122  |
| 23  | 17340 | 17633 | 294       | 97        | aaaagagg <sub>tgataaa</sub> ATG      |                                          | YP_001087449 hypothetical protein CD0968 [ <i>C. difficile</i> 630]                           | 91/97 (94%)     | 97                     | 2E-45   |
| 24  | 17633 | 17815 | 183       | 60        | aggagg <sub>ctatata</sub> ATG        |                                          | YP_529583 hypothetical protein CDBPCV119_gp32 [ <i>Clostridium</i> phage phi CD119]           | 57/60 (95%)     | 60                     | 7E-25   |
| 25  | 17877 | 18308 | 432       | 143       | aaggagg <sub>aaat</sub> ATG          | Holin                                    | ZP_05331982 putative cell wall hydrolase protein [ <i>C. difficile</i> QCD-63q42]             | 138/143 (97%)   | 143                    | 1E-73   |
| 26  | 18308 | 19156 | 849       | 283       | aaaggagg <sub>tgtaataa</sub> ATG     | Endolysine                               | YP_002290910 endolysin [ <i>Clostridium</i> phage phiCD27]                                    | 232/283 (82%)   | 270                    | 1E-126  |
| 27  | 19640 | 19281 | 360       | 119       | aaaggggaa <sub>tgataat</sub> ATG     |                                          | YP_004306132 hypothetical protein phiCD6356_31 [ <i>Clostridium</i> phage phiCD6356]          | 109/119 (92%)   | 129                    | 5E-53   |
| 28  | 20460 | 19642 | 819       | 272       | aaaaagggg <sub>tgatttaa</sub> TTG    | ParA-like protein                        | YP_004306133 ParA-like protein [ <i>Clostridium</i> phage phiCD6356]                          | 249/272 (92%)   | 272                    | 2E-143  |
| 29  | 20993 | 20811 | 183       | 60        | aaaggag <sub>taaaga</sub> ATG        |                                          | YP_004306134 hypothetical protein phiCD6356_33 [ <i>Clostridium</i> phage phiCD6356]          | 57/60 (95%)     | 60                     | 2E-25   |
| 30  | 21361 | 21233 | 129       | 42        | agaaaggagg <sub>caagaga</sub> ATG    | Membrane / Secreted protein              | ZP_05331937 hypothetical protein CdifQCD-6_19278 [ <i>C. difficile</i> QCD-63q42]             | 41/42 (98%)     | 42                     | 4E-07   |
| 31  | 21946 | 21794 | 153       | 50        | gaagggagg <sub>gaatagt</sub> ATG     | Membrane / Secreted protein              | YP_004306135 hypothetical protein phiCD6356_34 [ <i>Clostridium</i> phage phiCD6356]          | 49/50 (98%)     | 50                     | 1E-18   |
| 32  | 22171 | 22067 | 105       | 34        | gaggaa <sub>taaga</sub> TTG          |                                          |                                                                                               |                 |                        |         |
| 33  | 22787 | 22254 | 534       | 177       | aaaggggaa <sub>tgactt</sub> GTG      | DNA polymerase III, alpha subunit        | ZP_03292395 hypothetical protein CLOHIR_00338 [ <i>C. hiranonis</i> DSM 13275]                | 79/129 (61%)    | 276                    | 4E-34   |
| 34  | 23222 | 25378 | 2157      | 542       | ggagg <sub>ggataa</sub> ATG          | DNase / helicase                         | ZP_05331934 putative deoxyribonuclease [ <i>C. difficile</i> QCD-63q42]                       | 639/721 (89%)   | 721                    | 0       |
| 35  | 25399 | 25737 | 339       | 112       | ggagg <sub>aatgaat</sub> ATG         |                                          | ZP_05331933 hypothetical protein CdifQCD-6_19258 [ <i>C. difficile</i> QCD-63q42]             | 62/114 (54%)    | 115                    | 7E-22   |
| 36  | 26078 | 26185 | 108       | 35        | agggggg <sub>ggtttg</sub> TTG        |                                          | YP_004508416 hypothetical protein phiCD38-2_gp38 [ <i>Clostridium</i> phage phiCD38-2]        | 19/30 (63%)     | 31                     | 2E-04   |
| 37  | 26589 | 26215 | 375       | 124       | gaaaggg <sub>ttgtat</sub> ATG        | Transcriptional regulator (XRE family)   | ZP_05331920 transcriptional regulator, xre family protein [ <i>C. difficile</i> QCD-63q42]    | 77/117 (66%)    | 117                    | 2E-37   |
| 38  | 27011 | 27436 | 426       | 141       | gaagggaaaagg <sub>tgatatt</sub> ATG  |                                          | YP_004508419 hypothetical protein phiCD38-2_gp41 [ <i>Clostridium</i> phage phiCD38-2]        | 43/138 (31%)    | 141                    | 8E-11   |
| 39  | 27547 | 27696 | 150       | 49        | aaggag <sub>maacaa</sub> ATG         |                                          | [YP_004306146 hypothetical protein phiCD6356_45 [ <i>Clostridium</i> phage phiCD6356]         | 25/42 (60%)     | 58                     | 3E-05   |
| 40  | 27710 | 28063 | 354       | 117       | gaagggg <sub>tgtttga</sub> TTG       |                                          | YP_004306147 hypothetical protein phiCD6356_46 [ <i>Clostridium</i> phage phiCD6356]          | 35/99 (35%)     | 121                    | 5E-04   |
| 41  | 28075 | 28248 | 174       | 57        | aaggggg <sub>ctattt</sub> ATG        |                                          |                                                                                               |                 |                        |         |

TABLE S2. Putative coding sequences from φMMP04 and bioinformatics analyses of the deduced proteins

| ORF | Start | End   | Size (pb) | Size (aa) | Ribosome binding site (RBS)         | Predicted fonction <sup>a</sup> | BLAST hit and accession number [source organism] <sup>b</sup>                                           | Alignement (%ID) | Size (aa) <sup>c</sup> | E value |
|-----|-------|-------|-----------|-----------|-------------------------------------|---------------------------------|---------------------------------------------------------------------------------------------------------|------------------|------------------------|---------|
| 42  | 28245 | 28349 | 105       | 34        | -                                   |                                 |                                                                                                         |                  |                        |         |
| 43  | 28342 | 28599 | 258       | 85        | agaagggaag <sub>tgtagaa</sub> ATG   |                                 | YP_004306149 hypothetical protein phiCD6356_48 [ <i>Clostridium</i> phage phiCD6356]                    | 53/71 (75%)      | 71                     | 7E-23   |
| 44  | 28575 | 28727 | 153       | 50        | agaaaagga <sub>ggggcaaa</sub> ATG   |                                 | YP_004306152 hypothetical protein phiCD6356_51 [ <i>Clostridium</i> phage phiCD6356]                    | 25/42 (60%)      | 49                     | 0.67    |
| 45  | 28717 | 28977 | 261       | 86        | agaaagagagg <sub>ttcaaaag</sub> ATG |                                 | YP_004306155 hypothetical protein phiCD6356_54 [ <i>Clostridium</i> phage phiCD6356]                    | 52/73 (71%)      | 86                     | 1E-18   |
| 46  | 29221 | 29688 | 468       | 155       | aaaggggg <sub>taaaattg</sub> TTG    |                                 | YP_004306157 hypothetical protein phiCD6356_56 [ <i>Clostridium</i> phage phiCD6356]                    | 67/156 (43%)     | 153                    | 3E-17   |
| 47  | 29933 | 30436 | 504       | 167       | agaaa <sub>ctatggtatttt</sub> ATG   | Integrase                       | EHJ28455 site-specific recombinase, phage integrase family [ <i>Clostridium difficile</i> 002-P50-2011] | 124/167 (74%)    | 200                    | 8E-67   |
| 48  | 30634 | 30924 | 291       | 96        | aaaaagagg <sub>ggitta</sub> ATG     |                                 | YP_659579 hypothetical protein CDP03 [ <i>C. difficile</i> 630]                                         | 45/67 (67%)      | 71                     | 2E-17   |
| 49  | 30924 | 31217 | 294       | 97        | agagaa <sub>gggtatatt</sub> ATG     | HNH endonuclease                | YP_659578 putative HNH endonuclease [ <i>C. difficile</i> 630]                                          | 93/97 (96%)      | 97                     | 4E-41   |
| 50  | 31312 | 31425 | 114       | 37        | gaaaaa <sub>tcaga</sub> ATG         |                                 | EHJ28458 hypothetical protein HMPREF1122_02764 [ <i>Clostridium difficile</i> 002-P50-2011]             | 35/35 (100%)     | 129                    | 1E-13   |
| 51  | 31430 | 25    | 270       | 90        | agaaaagaaa <sub>gtaaaatt</sub> TTG  |                                 | EHJ28458 hypothetical protein HMPREF1122_02764 [ <i>Clostridium difficile</i> 002-P50-2011]             | 83/89 (93%)      | 129                    | 1E-49   |

<sup>a</sup> Inferred from BLASTp analyses on GenBank and ACLAME databases, and by conserved domains found by InterProScan analysis and through the conserved domains database (CDD) at NCBI

<sup>b</sup> Only the best or most relevant BLASTp hits are shown

<sup>c</sup> Size in amino acids (aa) of the BLASTp database subject
